# Supplementary material for: Impact of the Prevalence of Cognitive Impairment on the Accuracy of the Montreal Cognitive Assessment: The Advantage of Using two MoCA Thresholds to Identify Error-prone Test Scores
Source: PubMed Central journal article supplement — Alzheimer Dis Assoc Disord. 2020 Jan 13;34(3):248–53. doi: 10.1097/WAD.0000000000000365 (PMC7497609; doi:10.1097/wad.0000000000000365), 2020-01-13

Supplement B: Mixed frequencies and Mixed densities of all 30 ADC's, sorted on prevalence. In the plots of the Mixed densities of each ADC, the overall densities are overlaid as a line, while the threshold associated with the optimal Youden threshold is a vertical dark red line.

**Mixed frequencies, ADC = 1**

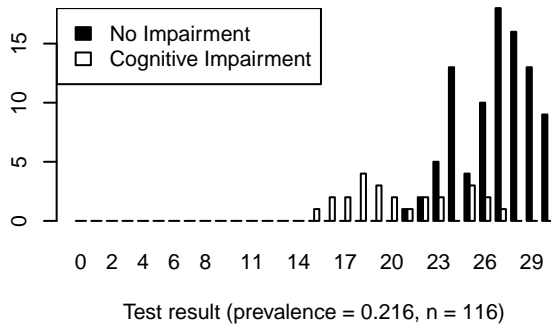

**Mixed densities, ADC = 1**

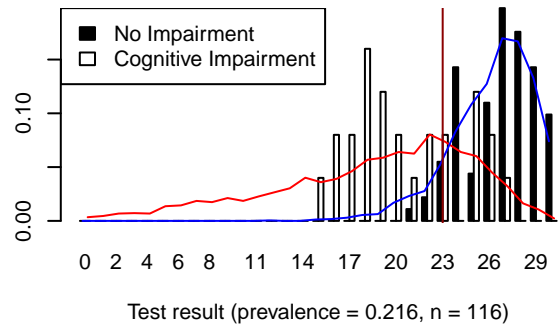

**Mixed frequencies, ADC = 2**

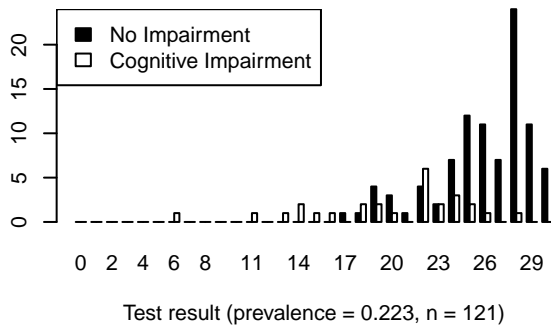

**Mixed densities, ADC = 2**

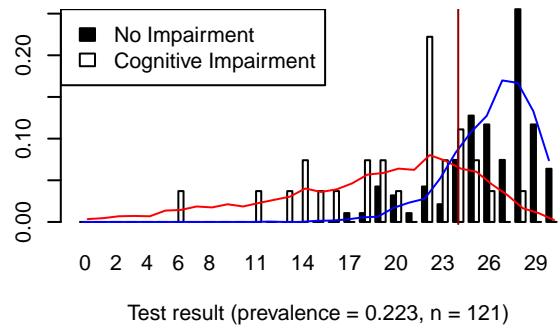

**Mixed frequencies, ADC = 3**

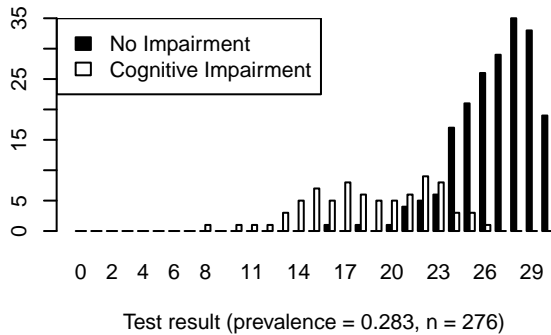

**Mixed densities, ADC = 3**

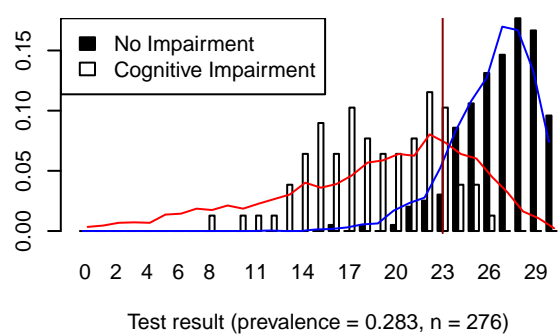

**Mixed frequencies, ADC = 4**

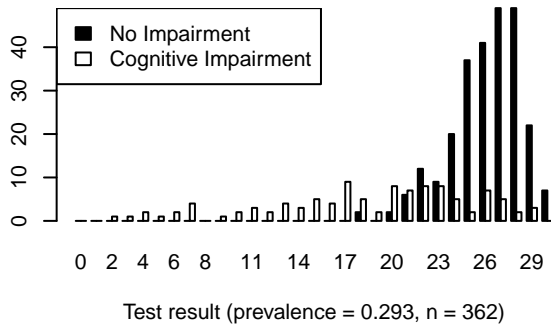

**Mixed densities, ADC = 4**

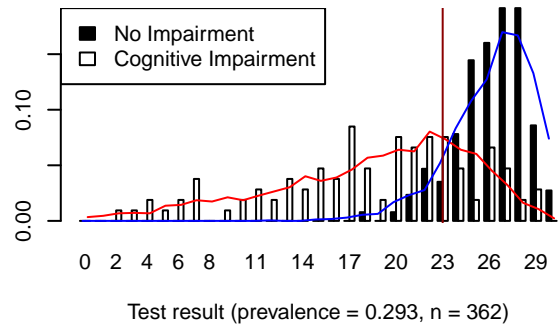

**Mixed frequencies, ADC = 5**

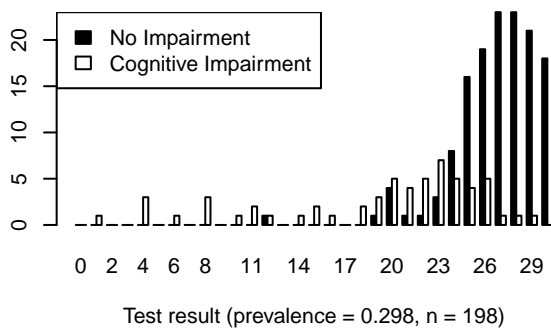

**Mixed densities, ADC = 5**

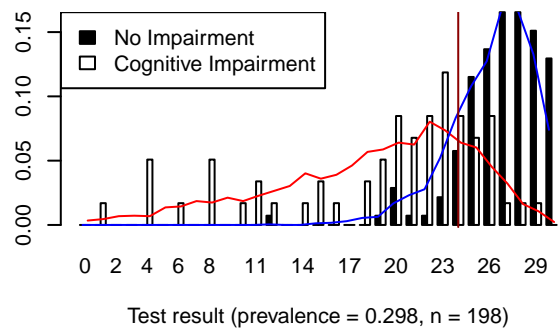

**Mixed frequencies, ADC = 6**

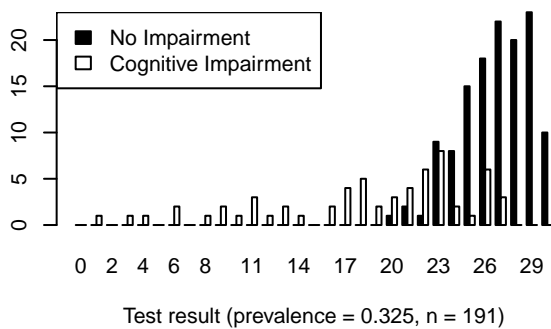

**Mixed densities, ADC = 6**

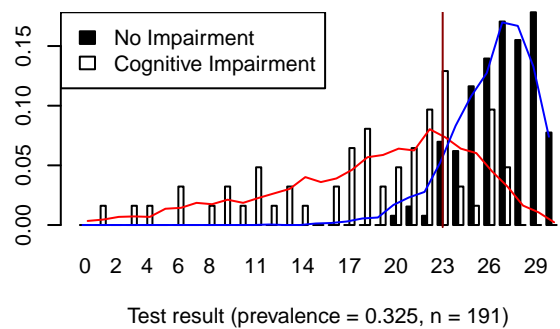

**Mixed frequencies, ADC = 7**

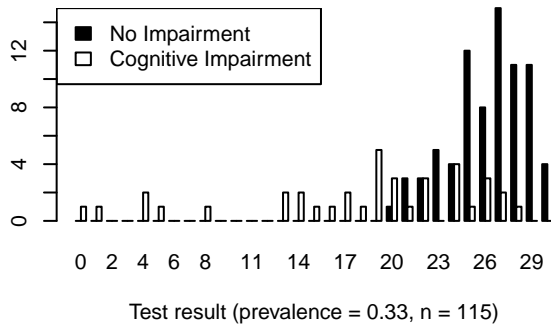

**Mixed densities, ADC = 7**

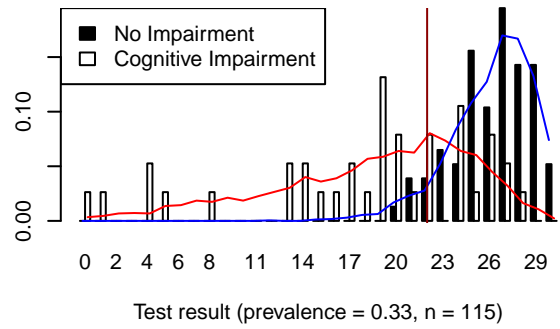

**Mixed frequencies, ADC = 8**

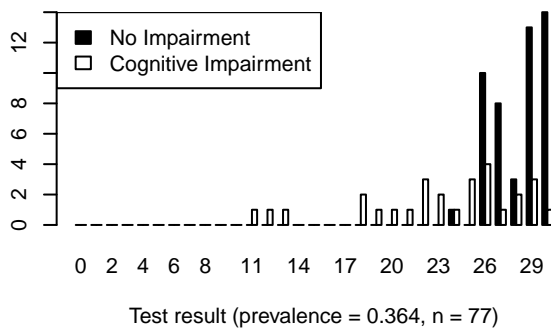

**Mixed densities, ADC = 8**

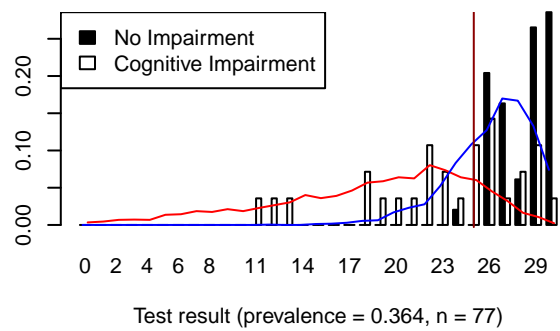

**Mixed frequencies, ADC = 9**

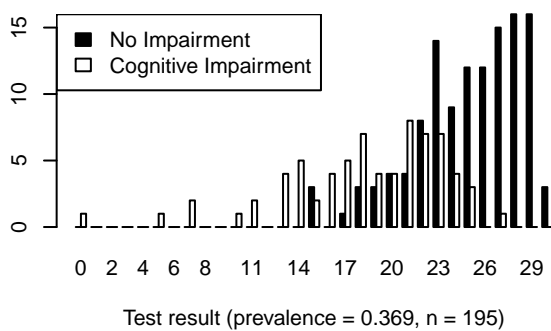

**Mixed densities, ADC = 9**

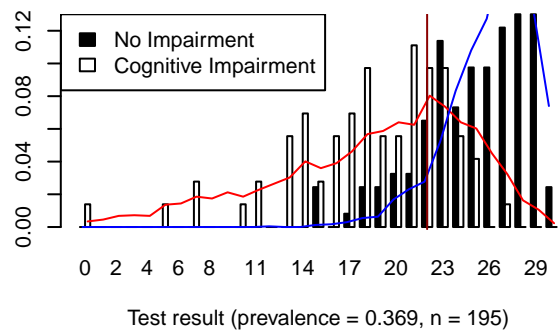

**Mixed frequencies, ADC = 10**

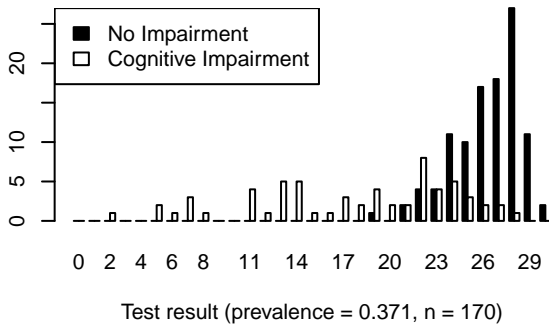

**Mixed densities, ADC = 10**

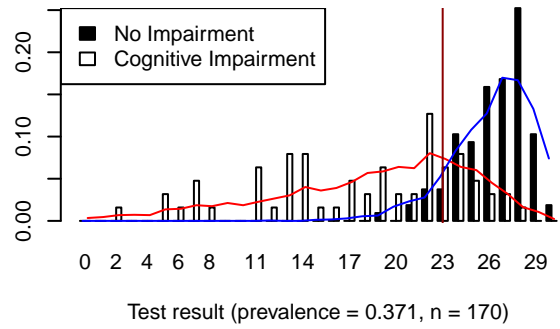

**Mixed frequencies, ADC = 11**

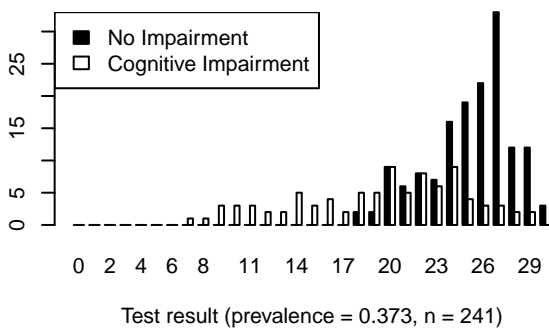

**Mixed densities, ADC = 11**

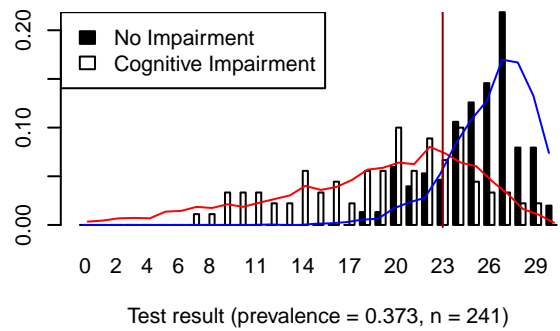

**Mixed frequencies, ADC = 12**

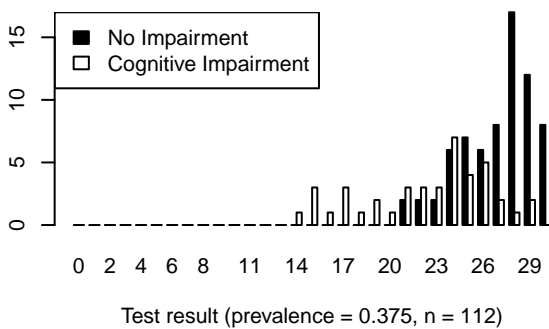

**Mixed densities, ADC = 12**

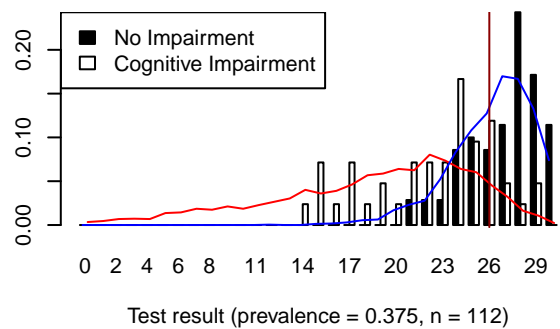

**Mixed frequencies, ADC = 13**

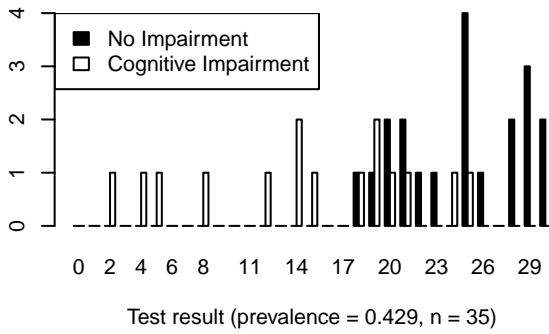

**Mixed densities, ADC = 13**

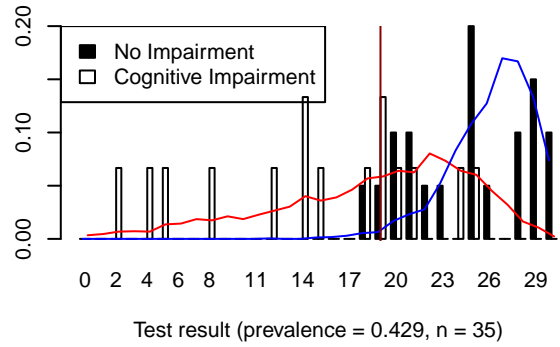

**Mixed frequencies, ADC = 14**

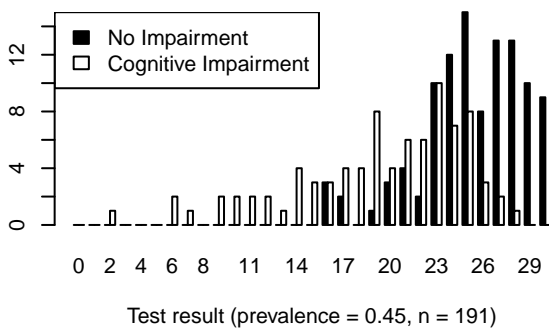

**Mixed densities, ADC = 14**

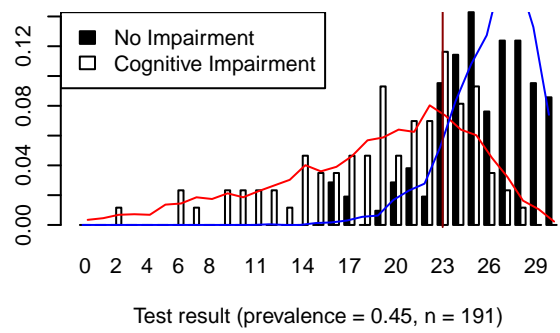

**Mixed frequencies, ADC = 15**

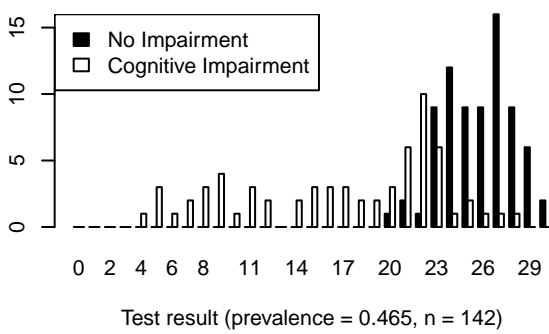

**Mixed densities, ADC = 15**

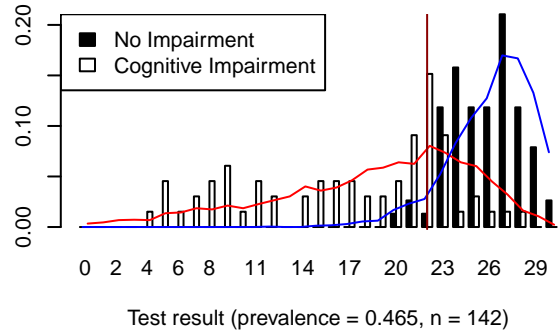

**Mixed frequencies, ADC = 16**

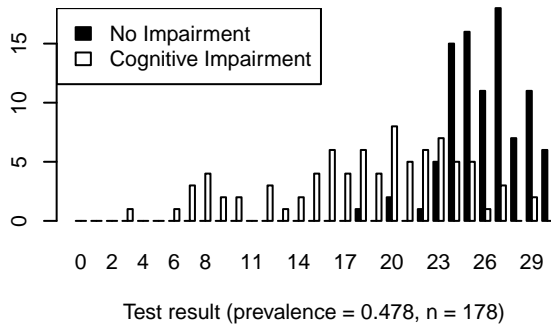

**Mixed densities, ADC = 16**

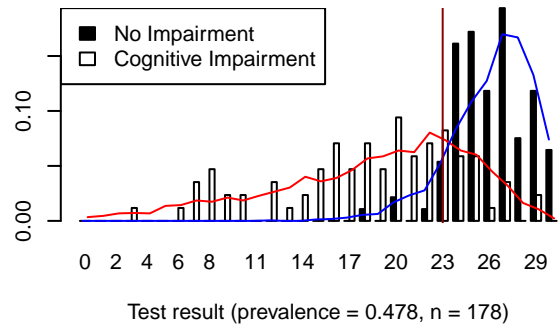

**Mixed frequencies, ADC = 17**

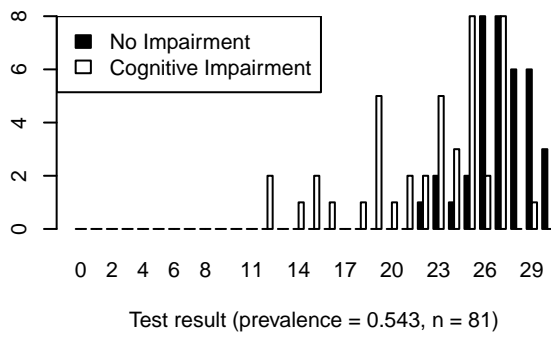

**Mixed densities, ADC = 17**

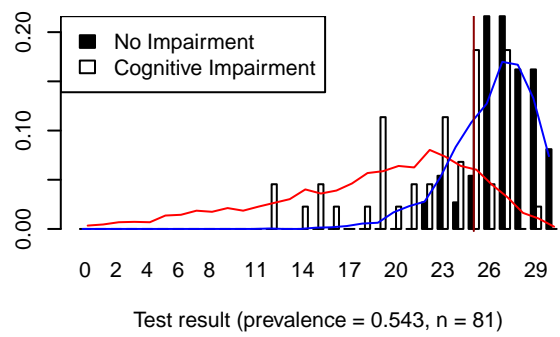

**Mixed frequencies, ADC = 18**

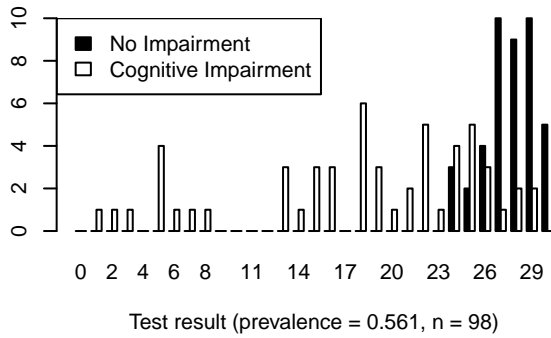

**Mixed densities, ADC = 18**

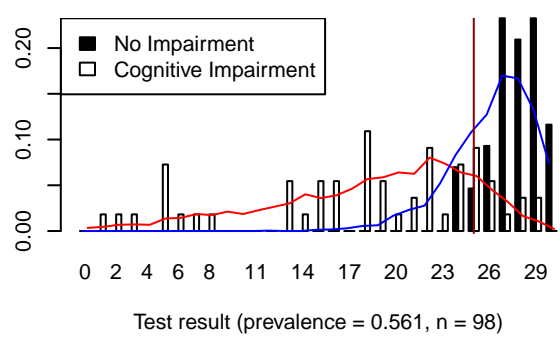

**Mixed frequencies, ADC = 19**

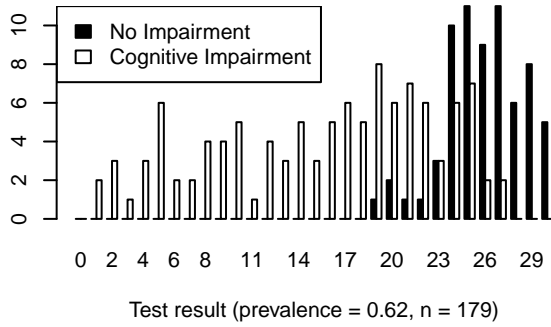

**Mixed densities, ADC = 19**

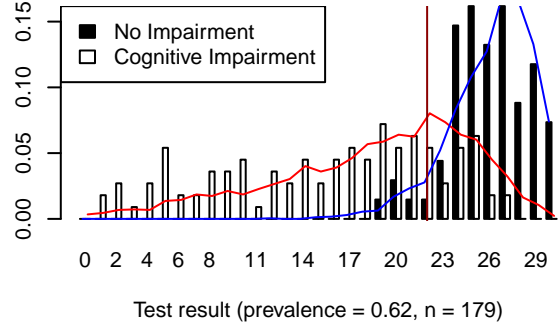

**Mixed frequencies, ADC = 20**

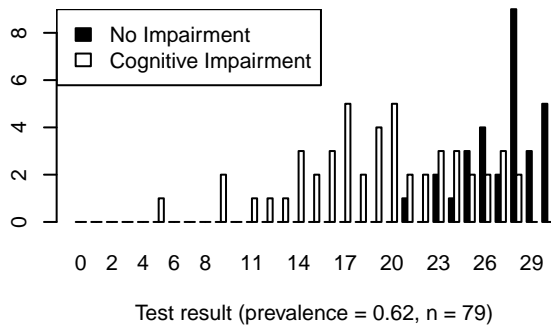

**Mixed densities, ADC = 20**

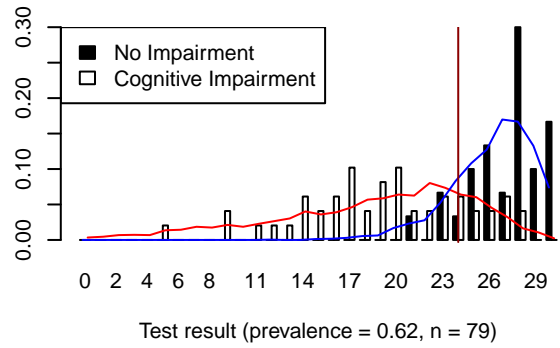

**Mixed frequencies, ADC = 21**

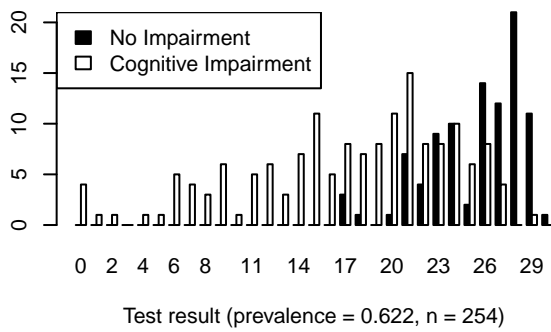

**Mixed densities, ADC = 21**

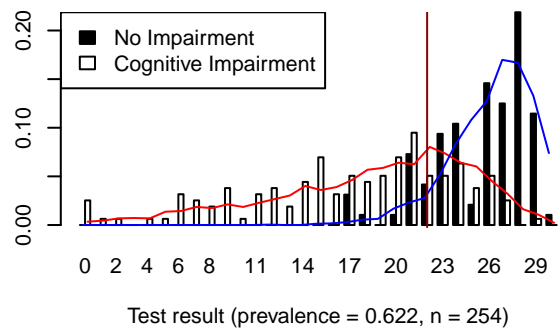



**Mixed frequencies, ADC = 22**

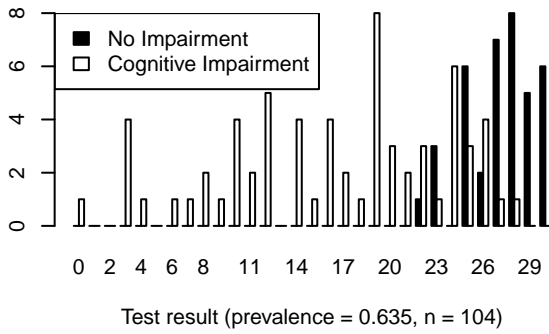

**Mixed densities, ADC = 22**

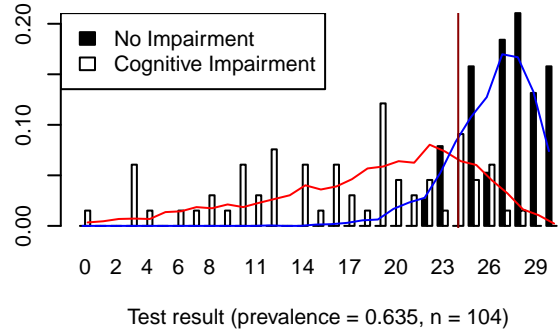

**Mixed frequencies, ADC = 23**

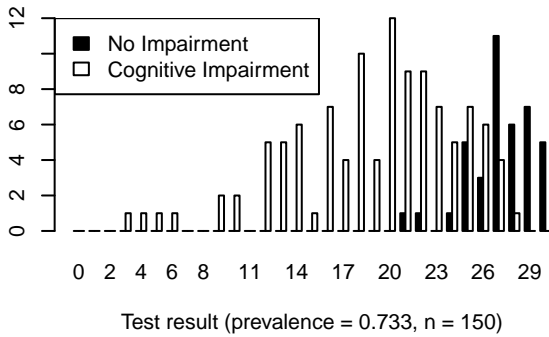

**Mixed densities, ADC = 23**

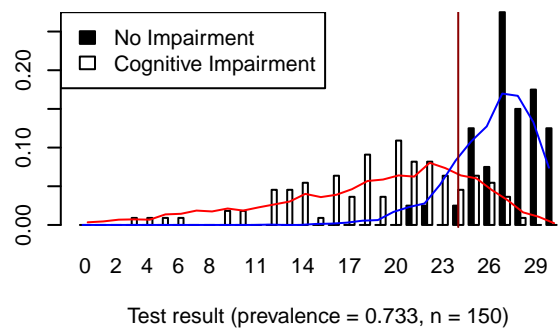

**Mixed frequencies, ADC = 24**

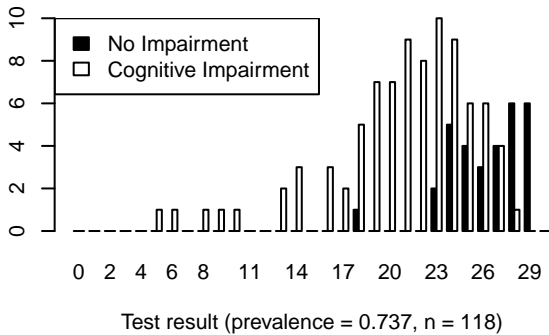

**Mixed densities, ADC = 24**

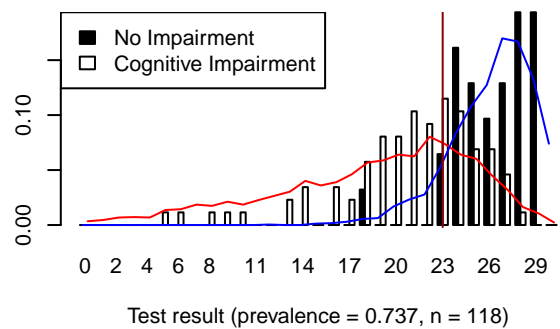

**Mixed frequencies, ADC = 25**

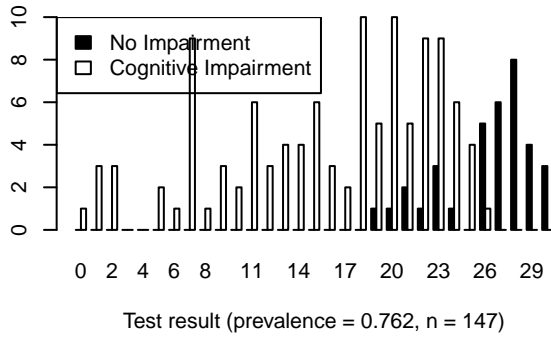

**Mixed densities, ADC = 25**

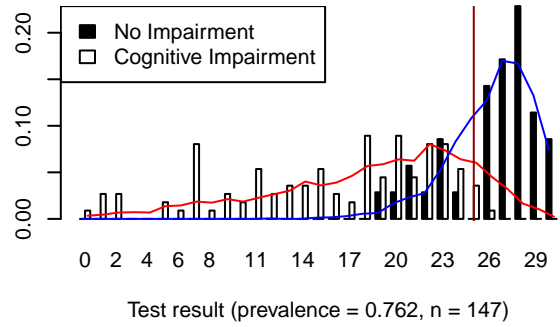

**Mixed frequencies, ADC = 26**

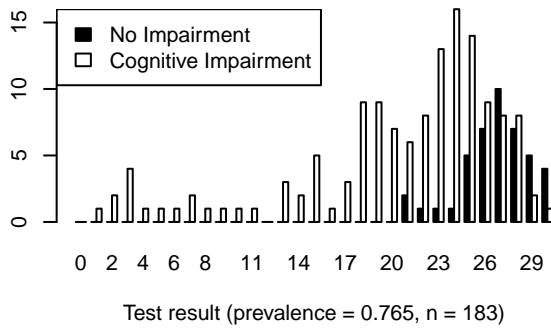

**Mixed densities, ADC = 26**

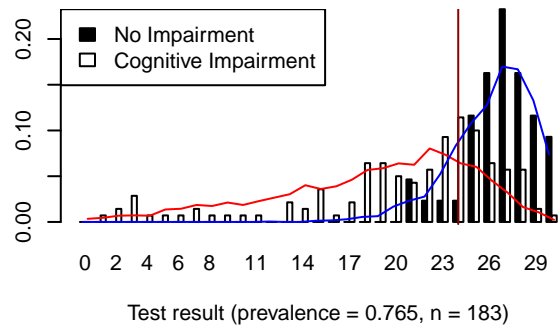

**Mixed frequencies, ADC = 27**

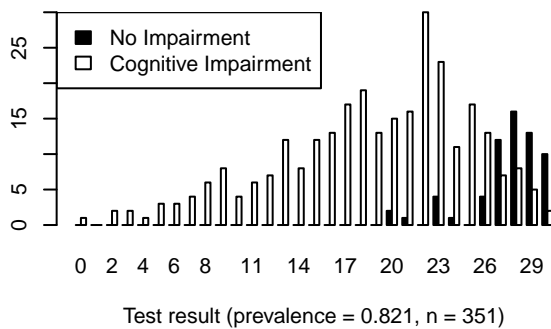

**Mixed densities, ADC = 27**

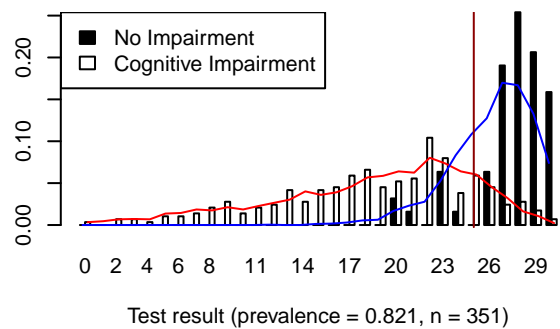

**Mixed frequencies, ADC = 28**

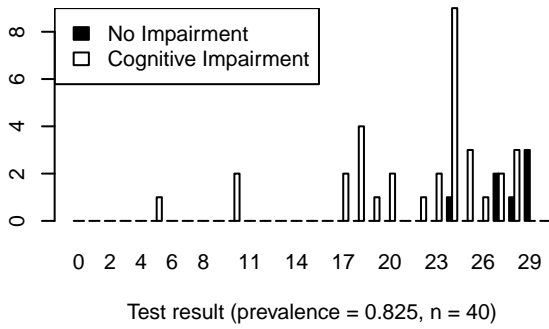

**Mixed densities, ADC = 28**

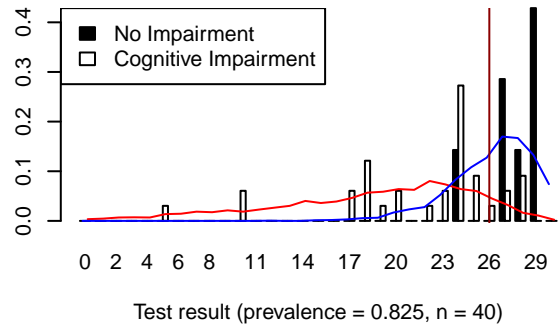

**Mixed frequencies, ADC = 29**

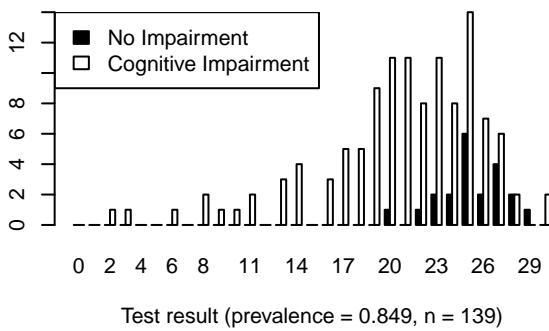

**Mixed densities, ADC = 29**

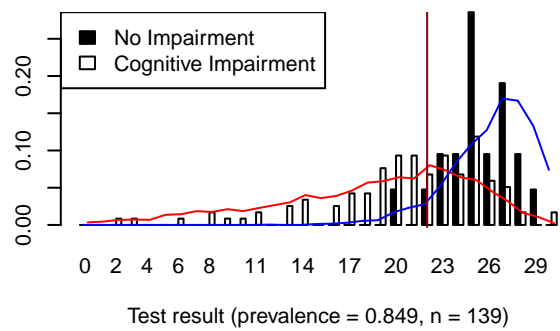

**Mixed frequencies, ADC = 30**

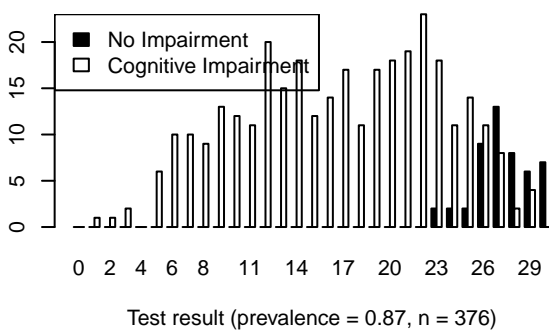

**Mixed densities, ADC = 30**

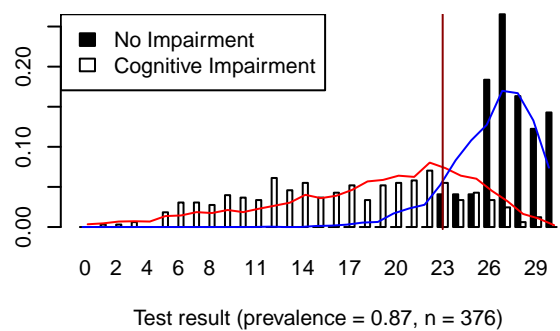

Supplement: wad-34-248-s002.pdf [file wad-34-248-s002.pdf]
